# Supplementary material
Source: HighWire-hosted journal article supplement (https://www.cmajopen.ca/content/suppl/2017/02/01/5.1.E90)
Supplement: open-2016-0099-original-submission.pdf [file open-2016-0099-original-submission.pdf]

1  
2  
3 **Title:** Unintentional injuries in children and youth from immigrant families in Ontario, Canada.

4  
5 **Authors:** Natasha Ruth Saunders, MSc, MD<sup>1,2,3</sup>, Alison, Macpherson<sup>3,4</sup>, PhD, Lisa Sheng<sup>3</sup>, MD,  
6 PhD, Astrid Guttman, MSc, MDCM<sup>1,2,3,5,6,7</sup>  
7

8  
9 **Affiliations:** <sup>1</sup>The Hospital for Sick Children, Toronto, Canada; <sup>2</sup>Department of Pediatrics,  
10 University of Toronto, Toronto, Canada; <sup>3</sup>Institute for Clinical Evaluative Sciences, Toronto,  
11 Canada; <sup>4</sup>York University, Toronto, Canada <sup>5</sup>Institute of Health Policy, Management and  
12 Evaluation, The University of Toronto, Toronto, Canada; <sup>6</sup>Dalla Lana School of Public Health,  
13 University of Toronto, Toronto, Canada; <sup>7</sup>Child Health Evaluative Sciences, SickKids Research  
14 Institute, Toronto, Canada.  
15

16  
17 **Address correspondence and reprint requests to:** Astrid Guttman, Institute for Clinical  
18 Evaluative Sciences, 2075 Bayview Avenue, Toronto, Ontario, M4N 3M5.  
19 [Astrid.guttman@ices.on.ca](mailto:Astrid.guttman@ices.on.ca) (t) 416-480-4055 ext. 3783 (f) 416-480-6048.  
20

21  
22 **Short title:** Pediatric immigrant unintentional injuries.  
23

24 **Key words:** immigration, injury, Ontario, pediatric  
25

26  
27 **Funding Source:** Astrid Guttman and Alison Macpherson are funded through Applied Chairs  
28 in Child Health Services and Policy Research from the Canadian Institutes for Health Research.  
29

30 **Financial Disclosure:** All authors have no financial relationships relevant to this article to  
31 disclose.  
32

33  
34 **Conflict of Interest:** All authors have no conflicts of interest to disclose.  
35

36  
37 **Contributors' Statement:** N. Saunders conceptualized and designed the study, interpreted the  
38 results, drafted the initial manuscript, revised the manuscript, and approved the final manuscript  
39 as submitted. L. Sheng analyzed the data, revised the manuscript, and approved the final  
40 manuscript as submitted. A. Macpherson and A. Guttman conceptualized and designed the  
41 study, interpreted the results, revised the manuscript, and approved the final manuscript as  
42 submitted. All authors approved the final manuscript as submitted and agree to be accountable  
43 for all aspects of the work.  
44

45  
46 **Disclaimer:** This study was supported by the Institute for Clinical Evaluative Sciences (ICES),  
47 which is funded by an annual grant from the Ontario Ministry of Health and Long-Term Care  
48 (MOHLTC). The opinions, results and conclusions reported in this paper are those of the authors  
49 and are independent from the funding sources. No endorsement by ICES or the Ontario  
50 MOHLTC is intended or should be inferred. Parts of this material are based on data and  
51 information compiled and provided by the Canadian Institute for Health Information (CIHI).  
52 However, the analyses, conclusions, opinions and statements expressed herein are those of the  
53 authors, and not necessarily those of CIHI.  
54  
55  
56  
57  
58  
59  
60

## Abstract

**Background:** Unintentional injury is the leading cause of childhood death. Injury is associated with a number of socio-demographic characteristics but little is known about risk in immigrants. The objective was to examine family immigrant status and unintentional injury.

**Methods:** Population-based, cross-sectional study of all children and youth (0 to 24 years) residing in Ontario, Canada from 2008-2012. Multiple health administrative databases were linked to Immigration, Refugees and Citizenship Canada's Permanent Resident Database. Unintentional injury events (emergency department visits, hospitalizations, deaths) were analyzed using Poisson regression models to estimate risk ratios (RR).

**Results:** Annualized injury rates were 11,749/100,000 ED visits, 267/100,000 hospitalizations, and 12/100,000 deaths. Injury risk was lower in immigrants across all causes of unintentional injuries (adjusted RR 0.56; 95% CI 0.53, 0.58). Within non-immigrants, lowest neighbourhood income quintile was associated with highest risk (RR 1.13; 95% CI 1.08, 1.18, quintile 5 vs. 1) whereas within immigrants, was associated with lowest risk of injury (RR 0.96; 95% CI 0.94, 0.98, quintile 5 vs. 1). Highest risk of injury in non-immigrants was among adolescents (15 to 19 years: RR 1.19; 95% CI 1.14, 1.24; versus 20 to 24 years) but within immigrants, was highest among young children (0 to 4 years: RR 1.23; 95% CI 1.15, 1.31; versus 20 to 24 years).

**Interpretation:** Risk of unintentional injury is lower among immigrants than Canadian-born children, supporting a healthy immigrant effect. Socioeconomic status and age have different associations with injury risk suggesting alternative causal pathways for injuries in immigrant children and youth.

## **Background**

Injury is one of the leading causes of emergency department (ED) visits and is the leading cause of death for children and youth in Canada<sup>1,2</sup> and in high income countries<sup>3</sup>. While some minor injuries may reflect healthy, active living, the vast majority of injuries cause some degree of harm and are preventable. Epidemiologic literature has identified a number of risk factors for unintentional childhood injuries. Adolescent males have consistently been shown to be at highest risk of injuries requiring medical attention compared with females and younger children<sup>1,4,5</sup>. Children living in rural areas have higher per capita rates of bicycle-related head injuries compared to those in urban settings<sup>6</sup> and individuals from lower income neighbourhoods or families are more likely to be injured<sup>7-11</sup>. A number of important policies and by-laws have been implemented over the past two decades in Ontario and elsewhere, such as mandatory bicycle helmets for minors riding bikes<sup>12-14</sup>, maximum water temperature by-laws for residential hot water heaters<sup>15</sup>, and improved playground safety standards<sup>16</sup> which have all effectively reduced injury rates in youth<sup>7,13,17-19</sup>. Despite these important strides, preventable injuries continue to occur suggesting room for improvement in policy development and education and behaviour modification for families to prevent injury, especially in high risk groups. Identifying such groups, in particular, by cause of injury, is important for effective injury prevention strategies.

One particular group that demands our attention is youth from immigrant families. Immigrants now make up approximately 20% of the Canadian population<sup>20</sup>. Exposures before and after migration may influence risk taking behaviours and awareness and implementation of safety standards. Known socio-demographic predictors of injury in the general population may have a different effect in immigrant populations. There is a paucity of published data describing injuries in immigrant children<sup>21,22</sup> and the literature reporting risk of injury in European and American immigrants is either conflicting or limited to adult occupational, race-related injuries<sup>9,23-31</sup>. Capitalizing on population-based linked data sources, our objectives were to 1) determine the prevalence of unintentional injury-related ED visits, hospitalizations, and deaths both overall and according to cause of injury in children and youth from immigrant families in Ontario, Canada; and 2) to test the association of unintentional injury and immigrant status, controlling

1  
2  
3 for other important predictors. We hypothesized immigrants' risk of injury would be lower  
4 compare with those from non-immigrant families.  
5  
6

## 7 **Methods**

### 8 *Study Design*

9  
10 This was a population-based cross-sectional study using data available at the Institute for  
11 Clinical Evaluative Sciences (ICES) through a research agreement from the Ontario Ministry of  
12 Health and Long-Term Care. Research ethics board approval was obtained from The Hospital  
13 for Sick Children and Sunnybrook Health Sciences Centre in Toronto, Ontario.  
14  
15  
16  
17  
18  
19

### 20 *Data Sources*

21  
22 Data sets from health administrative and demographic databases were linked using unique,  
23 encoded health identification numbers. Ontario has a single-payer universal Ontario Health  
24 Insurance Plan (OHIP) through which residents are insured for medically necessary care from  
25 physicians and hospitals. Immigrants admitted to Canada as permanent residents are eligible for  
26 OHIP after 3 months of residing in Ontario. Ontario's health care registry, the Registered  
27 Persons Database (RPDB), contains socio-demographic information for all residents eligible for  
28 OHIP and includes their age, sex, and postal code. The Canadian Institute for Health Information  
29 (CIHI) Discharge Abstract Database (DAD) and National Ambulatory Care Reporting System  
30 (NACRS) contains information, including diagnoses during admissions and ED visits to Ontario  
31 hospitals, respectively. Injury related deaths that occurred both in and out of hospital were  
32 ascertained from the Ontario Registrar General – Death (Vital Stats). Neighbourhood income  
33 quintile was obtained using Statistics Canada's Postal Code conversion file to link a patient's  
34 postal code at the dissemination area level (400 to 700 persons) based on the 2006 Canadian  
35 Census<sup>32</sup>. Rurality was determined using the Rurality Index of Ontario, a census derived  
36 rurality score determined by population density and travel time to a health care facility<sup>33</sup>.  
37  
38  
39  
40  
41  
42  
43  
44  
45  
46  
47  
48  
49

50 The Permanent Resident Data System (PRDS), a federal database maintained by Immigration,  
51 Refugees and Citizenship Canada, holds socio-demographic and immigration information on all  
52 permanent residents landing in Ontario from January 1<sup>st</sup>, 1985 to the present. Permanent  
53 residents are immigrants who have been granted to the right to stay and work in Canada without  
54 limitations on their stay. It does not include data on temporary or undocumented immigrants.  
55  
56  
57  
58  
59  
60

1  
2  
3  
4  
5  
6  
7  
8  
9  
10  
11  
12  
13  
14  
15  
16  
17  
18  
19  
20  
21  
22  
23  
24  
25  
26  
27  
28  
29  
30  
31  
32  
33  
34  
35  
36  
37  
38  
39  
40  
41  
42  
43  
44  
45  
46  
47  
48  
49  
50  
51  
52  
53  
54  
55  
56  
57  
58  
59  
60

Information is collected from official immigration documents, last updated at the port of entry on the date of landing. Overall probabilistic linkage to the RPDB identifies approximately 86% of immigrants<sup>34</sup>. The MOMBABY database, an ICES derived database, pairs all mothers with their newborns, delivered in hospital in Ontario. It links CIHI-DAD inpatient admission records of delivering mothers and their newborns. Through this database, newborns born in Canada to immigrant mothers were identified.

### *Study Population*

The study population included all children and youth from birth to 24 years of age residing in Ontario with a valid OHIP number from January 1<sup>st</sup> 2008 to December 31<sup>st</sup>, 2012. Records with a missing or invalid health card number, age, or sex were excluded.

### *Outcome Measures*

The main outcome measure was an unintentional injury-related visit to an ED or a hospitalization, or an unintentional injury-related death (in and out of hospital). The cause of injury was grouped according to the International Classification of Disease 10-CM External Cause of Injury Codes<sup>35</sup>. Multiple visits for the same patient were included however only one event per patient per day was included. Duplicated, overlapping, or transferred ED visits and hospitalizations were excluded.

### *Predictor*

The main exposure was immigrant status. Immigrants were defined as any child or youth who was a permanent resident (landed immigrant) arriving in Canada after January 1<sup>st</sup>, 1985 or any child or youth with a mother who was a permanent resident arriving in Canada after January 1<sup>st</sup>, 1985. Children of immigrant mothers arriving prior to development of the PRDS in 1985 were considered non-immigrants.

### *Covariates*

We included a number of relevant covariates potentially associated with injury based on the literature or clinical plausibility. Adolescents and males have both been shown to have higher risk of injury compared with children and females<sup>1, 4, 36</sup> and therefore age (at the time of injury) and sex were included. Neighbourhood income quintile at the time of injury and urban/rural

1  
2  
3 residence (dichotomized) were included as low income and rural residence have been associated  
4 with risk of injury<sup>6, 8, 11, 14</sup>. These demographic characteristics were based on information from  
5 health records during each study year.  
6  
7

### 8 9 *Statistical Analysis*

10 Descriptive statistics were performed for the main independent variables, outcome variables and  
11 covariates. The total number of events as well as the age-sex standardized (2006 Canadian  
12 census) and crude injury rates were calculated. To compare outcomes of all immigrants and non-  
13 immigrants, multiple variable Poisson regression models were used to compute risk ratios with  
14 95% confidence intervals. For each model, variables were selected *a priori* and included in the  
15 regression analysis. The main model included both immigrants and non-immigrants but because  
16 the initial descriptive results suggested different associations between socio-demographics and  
17 injury in immigrants and non-immigrants, analyses were also carried out stratifying by each  
18 exposure group. To determine cause-specific injury risk, crude rates of injury events pooled for  
19 each specific cause were calculated by immigrant status. Subsequently, multiple variable  
20 Poisson regression models were used to compare cause-specific risk of injury by immigrant  
21 status. All statistical modelling was carried out using SAS version 9.3 (SAS Institute, Cary,  
22 NC).  
23  
24  
25  
26  
27  
28  
29  
30  
31  
32  
33  
34

### 35 **Results**

36 There was an annualized mean of 3,173,391 non-immigrants and 910,258 immigrants included  
37 in the study. Compared with non-immigrants, immigrants had a greater proportion of young,  
38 urban, and lower neighbourhood income quintile individuals (Table 1). Overall age-sex  
39 standardized annual rates of unintentional injuries were 11,749/100,000 ED visits, 267/100,000  
40 hospitalizations, and 12/100,000 deaths.  
41  
42  
43  
44  
45  
46

47 Table 2 shows rates of unintentional injury-related events by immigrant status. Compared with  
48 non-immigrants, immigrants had lower rates of ED visits, hospitalizations, and deaths from  
49 unintentional injury across all age groups. Rates of injury-related ED visits by age differed  
50 between immigrants and non-immigrants. Within immigrants, those in the youngest age group  
51 (0 to 4 years) had the highest ED visit rates (7754/100,000) whereas within non-immigrants  
52 those in the 15 to 19-year age group highest rates (15,940/100,000). Injury related  
53  
54  
55  
56  
57  
58  
59  
60

1  
2  
3 hospitalizations and deaths showed similar patterns by age in immigrants and non-immigrants  
4 with highest rates in the 15 to 19 and 20 to 24-year age groups. Among non-immigrants,  
5 individuals in the lowest neighbourhood income quintile had the highest rates of ED visits for  
6 injury. This is in contrast to findings within immigrants, where those in the highest income  
7 quintile had the highest rates of ED visits. These differential trends in the association between  
8 neighbourhood income quintile and injury rates were not observed in injuries requiring  
9 hospitalization or causing death. Rural and male populations had higher rates of injury in both  
10 immigrant and non-immigrant groups, regardless of injury severity.

11  
12 After adjustment for age, sex, income, and rurality, immigrants had a 44% lower risk of  
13 unintentional injury overall compared with non-immigrants (risk ratio [RR] = 0.56, 95%  
14 confidence intervals [CI] 0.53, 0.58). Predictors of injury included male sex (RR 1.42, 95% CI  
15 1.38, 1.46) and rural residence (RR = 1.60, 95% CI 1.54, 1.67). In the models stratified by  
16 immigrant status, age and income predicted injury differently in immigrants and non-immigrants  
17 (Table 3). Young age (0 to 4 years) had the highest risk of injury within immigrants (RR = 1.23,  
18 95% CI 1.15, 1.31) whereas older age (15 to 19 years) had the highest risk of injury in non-  
19 immigrants (RR = 1.19, 95% CI 1.14, 1.24). Low income quintile was associated with a lower  
20 risk of injury within immigrants (RR = 0.87, 95% CI 0.81, 0.93 quintile 1 vs. 5) whereas it was  
21 associated with higher risk of injury in non-immigrants (RR = 1.13, 95% CI 1.08, 1.18 quintile 1  
22 vs. 5).

23  
24 Table 4 describes cause specific injury risk by immigrant status. Risk of unintentional injury was  
25 lower across all causes of injury in immigrants. The most common causes of unintentional  
26 injury in both groups were falls and being struck. Motor vehicle injuries were the most common  
27 cause of death in immigrants (1.3/100,000) and non-immigrants (3.6/100,000), followed by  
28 poisoning-related deaths (0.6/100,000 in immigrants and 1.9/100,000 in non-immigrants).

## 29 **Discussion**

30  
31 In this large, population-based study, we report a 44% lower risk of unintentional injury in  
32 immigrant children and youth compared with those from non-immigrant families. The reduced  
33 risk was observed across all causes of injury. Income, which has traditionally had an inverse  
34 association with injuries<sup>1, 8, 10, 14, 36</sup> had the opposite association in immigrant populations for ED  
35 visits. Specifically, high neighbourhood income quintile was associated with a high risk of  
36  
37  
38  
39  
40  
41  
42  
43  
44  
45  
46  
47  
48  
49  
50  
51  
52  
53  
54  
55  
56  
57  
58  
59  
60



1  
2  
3 injury in immigrants. Adolescents had the highest risk of injury among non-immigrants,  
4  
5 whereas among immigrants, risk was highest in infants and young children.  
6

7  
8 To our knowledge, this is the first population-based study in North America to estimate the  
9 overall risk of unintentional injury in immigrant children and youth. One Danish registry study  
10 evaluated unintentional injuries in children of foreign born mothers and reported lower rates  
11 compared with children of Danish mothers. Lower rates of injury were observed for all causes  
12 except burns and foreign bodies in the ear<sup>9</sup>. Smaller Canadian studies have shown a 1.35 times  
13 higher relative risk of bicycling related injuries in new ( $\leq 5$  years in Canada) immigrants<sup>37</sup> and a  
14 higher risk of serious falls from buildings<sup>21</sup> and from falling televisions<sup>22</sup> in immigrants  
15 compared with non-immigrants. A few studies have evaluated injury fatalities in foreign born  
16 populations and found mixed results. Karimi et al. showed that compared to native Swedes,  
17 children with foreign backgrounds had higher risk of injury fatality with a particularly high risk  
18 of transportation and drowning related deaths in boys and fire/flame and fall deaths in girls<sup>31</sup>.  
19 Similarly, Kahl et al.<sup>38</sup> reported higher rates of drowning in young immigrant boys compared  
20 with native Germans and Stirbu et al.<sup>39</sup> have shown higher risk of injury mortality in ethnic  
21 minorities in the Netherlands. These studies are in contrast to ours and that of Sorenson et al.<sup>40</sup>  
22 in which immigrant children have lower risk of injury fatality.  
23  
24  
25  
26  
27  
28  
29  
30  
31  
32  
33  
34

35 The associations with high injury risk and low socioeconomic status and adolescent age are  
36 well established in general populations of both Canadian and other children<sup>1, 7, 9, 13, 35</sup>. However,  
37 our study suggests that this may not be the case in all subgroups. Our findings, the first to report  
38 a higher risk of injury in high income and young immigrants, demonstrate different causal  
39 pathways may exist for injury in immigrants and strategies for prevention should be targeted  
40 accordingly. Only one other study testing the association of socioeconomic status and injuries in  
41 immigrant children has been published. They report within foreign born children in Sweden, the  
42 risk of hospitalization and death due to unintentional injuries is higher in children with the lowest  
43 parental education compared to those with the highest parental education<sup>23</sup>.  
44  
45  
46  
47  
48  
49  
50

51 The lower observed rates of unintentional injury in Ontario's immigrant population may be  
52 explained by Canada's immigrant selection and settlement policies that select for healthy, highly  
53 educated, motivated, and resourceful individuals. Certain sociocultural factors in foreign-born  
54 families such as reduced risk taking behaviours<sup>25</sup>, familial and social support systems<sup>41</sup>, and  
55  
56  
57  
58  
59  
60



1  
2  
3 less physical activity, especially through high risk sporting activities, may explain some of our  
4 injury findings. This latter explanation may account for the higher rates of injuries in non-  
5 immigrant adolescents. Socioeconomic differences in injury rates, especially for milder injuries  
6 not requiring hospitalization, may be due to different care seeking behaviours among immigrants  
7  
8  
9  
10  
11 <sup>42-44</sup> or disparities in access to primary care <sup>45</sup>.

### 12 *Strengths and Limitations*

13  
14 Major strengths of this study include the large sample size using population level databases.  
15 This study is distinguished from existing ones which are based on smaller cohorts, rely on self-  
16 report, or focus exclusively on adults. However, there are important limitations. These include  
17 not capturing minor injuries that did not result in an ED or hospital interaction that may have  
18 been treated in a medical office or at home. Care seeking behaviour may differ between study  
19 groups which may have affected results for minor injuries. Better information on contributing  
20 factors (alcohol, drugs, behavioural disorders, and education levels) would have helped to  
21 contextualize our results. Misclassification of some immigrants (i.e. temporary/undocumented  
22 immigrants, immigrant mothers who landed in Canada prior to 1985 when our PRDS database  
23 began, immigrants who landed in another Canadian province and subsequently moved to  
24 Ontario) may have also affected our results. Paternal immigration status may also be important  
25 in understanding risk of injury but linkage was not feasible.  
26  
27  
28  
29  
30  
31  
32  
33  
34  
35  
36

### 37 **Conclusions**

38  
39 Children and youth from immigrant families have a lower risk of unintentional injury compared  
40 with Canadian-born children and youth. Socio-demographic factors that traditionally predict  
41 injury in most populations do not apply universally to immigrant populations suggesting  
42 different causal pathways for injury. Ongoing epidemiologic studies within immigrants can help  
43 identify protective factors within this group that may be helpful for improving injury prevention  
44 in the general population while maintaining healthy and active development.  
45  
46  
47  
48  
49  
50  
51  
52  
53  
54  
55  
56  
57  
58  
59  
60

1  
2  
3 **Abbreviations**  
4

5 (CI) Confidence interval, (CIHI) Canadian Institute for Health Information, (DAD) Discharge  
6 Abstract Database, (ED) Emergency department, (ICES) Institute for Clinical Evaluative  
7 Sciences, (MOHLTC) Ministry of Health and Long-Term Care, (NACRS) National Ambulatory  
8 Care Reporting System, (OHIP) Ontario Health Insurance Plan, (PRDS) Permanent Resident  
9 Data System, (RPDB) Registered Persons Database, (RR) Risk ratio  
10  
11  
12  
13  
14  
15  
16  
17  
18  
19  
20  
21  
22  
23  
24  
25  
26  
27  
28  
29  
30  
31  
32  
33  
34  
35  
36  
37  
38  
39  
40  
41  
42  
43  
44  
45  
46  
47  
48  
49  
50  
51  
52  
53  
54  
55  
56  
57  
58  
59  
60

Confidential

## References

1. Macpherson AK, Cernat G, Schull MJ. Injuries in Ontario. *Healthc Q*. 2006;9(1):29-30.
2. Public Health Agency of Canada Facts on Injury: Public Health Agency of Canada; 2006 [January 6th, 2016]. Available from: <http://www.phac-aspc.gc.ca/injury-bles/facts-eng.php>.
3. Sminkey L. World report on child injury prevention. *Inj Prev*. 2008;14(1):69.
4. Fridman L, Fraser-Thomas JL, McFaul SR, Macpherson AK. Epidemiology of sports-related injuries in children and youth presenting to Canadian emergency departments from 2007-2010. *BMC Sports Sci Med Rehabil*. 2013;5(1):30.
5. Wattie N, Cobley S, Macpherson A, Howard A, Montelpare WJ, Baker J. Injuries in Canadian youth ice hockey: the influence of relative age. *Pediatrics*. 2007;120(1):142-8.
6. Macpherson AK, To TM, Parkin PC, Moldofsky B, Wright JG, Chipman ML, et al. Urban/rural variation in children's bicycle-related injuries. *Accid Anal Prev*. 2004;36(4):649-54.
7. Macpherson AK, Jones J, Rothman L, Macarthur C, Howard AW. Safety standards and socioeconomic disparities in school playground injuries: a retrospective cohort study. *BMC Public Health*. 2010;10:542.
8. Agran PF, Winn DG, Anderson CL, Del Valle C. Family, social, and cultural factors in pedestrian injuries among Hispanic children. *Inj Prev*. 1998;4(3):188-93.
9. Laursen B, Moller H. Unintentional injuries in children of Danish and foreign-born mothers. *Scand J Public Health*. 2009;37(6):577-83.
10. Birken CS, Parkin PC, To T, Macarthur C. Trends in rates of death from unintentional injury among Canadian children in urban areas: influence of socioeconomic status. *CMAJ*. 2006;175(8):867.
11. Birken CS, Parkin PC, To T, Wilkins R, Macarthur C. Neighborhood socioeconomic status and homicides among children in urban Canada. *Pediatrics*. 2009;123(5):e815-9.

- 1  
2  
3  
4  
5  
6  
7  
8  
9  
10  
11  
12  
13  
14  
15  
16  
17  
18  
19  
20  
21  
22  
23  
24  
25  
26  
27  
28  
29  
30  
31  
32  
33  
34  
35  
36  
37  
38  
39  
40  
41  
42  
43  
44  
45  
46  
47  
48  
49  
50  
51  
52  
53  
54  
55  
56  
57  
58  
59  
60
12. Parkin PC, Degroot J, Macpherson A, Fuselli P, Macarthur C. Canadian parents' attitudes and beliefs about bicycle helmet legislation in provinces with and without legislation. *Chronic Dis Inj Can.* 2014;34(1):8-11.
  13. Macpherson AK, To TM, Macarthur C, Chipman ML, Wright JG, Parkin PC. Impact of mandatory helmet legislation on bicycle-related head injuries in children: a population-based study. *Pediatrics.* 2002;110(5):e60.
  14. Macpherson AK, Macarthur C, To TM, Chipman ML, Wright JG, Parkin PC. Economic disparity in bicycle helmet use by children six years after the introduction of legislation. *Inj Prev.* 2006;12(4):231-5.
  15. Ontario Building Code Act 2004 [January 6th, 2016]. Available from: [http://www.e-laws.gov.on.ca/html/source/regs/english/2004/elaws\\_src\\_regs\\_r04023\\_e.htm](http://www.e-laws.gov.on.ca/html/source/regs/english/2004/elaws_src_regs_r04023_e.htm).
  16. Children's playspaces and equipment. 2007.
  17. Howard AW, MacArthur C, Willan A, Rothman L, Moses-McKeag A, MacPherson AK. The effect of safer play equipment on playground injury rates among school children. *CMAJ.* 2005;172(11):1443-6.
  18. Macpherson A, Spinks A. Bicycle helmet legislation for the uptake of helmet use and prevention of head injuries. *Cochrane Database Syst Rev.* 2007(2):CD005401.
  19. Spinks A, Wasiak J, Cleland H, Beben N, Macpherson AK. Ten-year epidemiological study of pediatric burns in Canada. *J Burn Care Res.* 2008;29(3):482-8.
  20. Statistics Canada, Citizenship and Immigration Canada. Facts and figures 2011. Immigration overview – permanent and temporary residents. 2013.
  21. Mayer L, Meuli M, Lips U, Frey B. The silent epidemic of falls from buildings: analysis of risk factors. *Pediatr Surg Int.* 2006;22(9):743-8.

- 1  
2  
3  
4  
5  
6  
7  
8  
9  
10  
11  
12  
13  
14  
15  
16  
17  
18  
19  
20  
21  
22  
23  
24  
25  
26  
27  
28  
29  
30  
31  
32  
33  
34  
35  
36  
37  
38  
39  
40  
41  
42  
43  
44  
45  
46  
47  
48  
49  
50  
51  
52  
53  
54  
55  
56  
57  
58  
59  
60
22. Mills J, Grushka J, Butterworth S. Television-related injuries in children--the British Columbia experience. *J Pediatr Surg.* 2012;47(5):991-5.
  23. Beiki O, Karimi N, Mohammadi R. Parental educational level and injury incidence and mortality among foreign-born children: a cohort study with 46 years follow-up. *J Inj Violence Res.* 2014;6(1):37-43.
  24. Schyllander J, Janson S, Nyberg C, Eriksson UB, Stark Ekman D. Case analyses of all children's drowning deaths occurring in Sweden 1998-2007. *Scand J Public Health.* 2013;41(2):174-9.
  25. Xiang H, Yu S, Zhang X, Scurlock C, Smith GA, Stallones L. Behavioral risk factors and unintentional injuries among U.S. immigrant adults. *Ann Epidemiol.* 2007;17(11):889-98.
  26. Chong VE, Lee WS, Victorino GP. Potential disparities in trauma: the undocumented Latino immigrant. *J Surg Res.* 2014;191(2):251-5.
  27. Grzywacz JG, Arcury TA, Marin A, Carrillo L, Coates ML, Burke B, et al. The organization of work: implications for injury and illness among immigrant Latino poultry-processing workers. *Arch Environ Occup Health.* 2007;62(1):19-26.
  28. Arcury TA, Cartwright MS, Chen H, Rosenbaum DA, Walker FO, Mora DC, et al. Musculoskeletal and neurological injuries associated with work organization among immigrant Latino women manual workers in North Carolina. *Am J Ind Med.* 2014;57(4):468-75.
  29. Menendez CK, Havea SA. Temporal patterns in work-related fatalities among foreign-born workers in the US, 1992-2007. *J Immigr Minor Health.* 2011;13(5):954-62.
  30. Singh GK, Siahpush M. Ethnic-immigrant differentials in health behaviors, morbidity, and cause-specific mortality in the United States: an analysis of two national data bases. *Hum Biol.* 2002;74(1):83-109.

- 1  
2  
3 31. Karimi N, Beiki O, Mohammadi R. Risk of fatal unintentional injuries in children by  
4 migration status: a nationwide cohort study with 46 years' follow-up. *Inj Prev*. 2015;21(e1):e80-  
5  
6  
7  
8 7.  
9  
10 32. Statistics Canada Dissemination Area: Statistics Canada; 2012 [October 9th, 2014].  
11 Available from: <http://www12.statcan.gc.ca/census-recensement/2011/ref/dict/geo021-eng.cfm>.  
12  
13  
14 33. Kralj B. OMA Economics Department Measuring Rurality - RIO2008\_BASIC:  
15 Methodology and Results. 2009.  
16  
17  
18 34. Institute for Clinical Evaluative Sciences Dataset Dictionary 2013 [January 6th, 2016].  
19 Available from: <https://datadictionary.ices.on.ca/Applications/DataDictionary/Default.aspx>.  
20  
21  
22  
23 35. Annest JL, Hedegaard H, Chen LH, Warner M, Smalls E. Centers for Disease Control  
24 and Prevention Proposed framework for presenting injury data using ICD-10-CM external cause  
25 of injury codes. Atlanta, GA: 2014.  
26  
27  
28  
29  
30  
31 36. Peden M, Oyegbite K, Ozanne-Smith J. World Health Organization, UNICEF World  
32 Report on Child Injury Prevention. Geneva, Switzerland: 2008.  
33  
34  
35  
36 37. Davison CM, Torunian M, Walsh P, Thompson W, McFaull S, Pickett W. Bicycle helmet  
37 use and bicycling-related injury among young Canadians: an equity analysis. *Int J Equity Health*.  
38 2013;12:48.  
39  
40  
41  
42  
43 38. Kahl H, Dortschy R, Ellsasser G. [Injuries among children and adolescents (1-17 years)  
44 and implementation of safety measures. Results of the nationwide German Health Interview and  
45 Examination Survey for Children and Adolescents (KiGGS)]. *Bundesgesundheitsblatt*  
46 *Gesundheitsforschung Gesundheitsschutz*. 2007;50(5-6):718-27.  
47  
48  
49  
50  
51 39. Stirbu I, Kunst AE, Bos V, van Beeck EF. Injury mortality among ethnic minority groups  
52 in the Netherlands. *J Epidemiol Community Health*. 2006;60(3):249-55.  
53  
54  
55  
56  
57  
58  
59  
60

- 1  
2  
3  
4  
5  
6  
7  
8  
9  
10  
11  
12  
13  
14  
15  
16  
17  
18  
19  
20  
21  
22  
23  
24  
25  
26  
27  
28  
29  
30  
31  
32  
33  
34  
35  
36  
37  
38  
39  
40  
41  
42  
43  
44  
45  
46  
47  
48  
49  
50  
51  
52  
53  
54  
55  
56  
57  
58  
59  
60
40. Sorenson SB, Shen H. Mortality among young immigrants to California: injury compared to disease deaths. *J Immigr Health*. 1999;1(1):41-7.
41. Mendoza FS. Health disparities and children in immigrant families: a research agenda. *Pediatrics*. 2009;124 Suppl 3:S187-95.
42. Guzder J, Yohannes S, Zelkowitz P. Helpseeking of immigrant and native born parents: a qualitative study from a montreal child day hospital. *J Can Acad Child Adolesc Psychiatry*. 2013;22(4):275-81.
43. Moineddin R, Meaney C, Agha M, Zagorski B, Glazier RH. Modeling factors influencing the demand for emergency department services in Ontario: a comparison of methods. *BMC Emerg Med*. 2011;11:13.
44. Javier JR, Wise PH, Mendoza FS. The relationship of immigrant status with access, utilization, and health status for children with asthma. *Ambul Pediatr*. 2007;7(6):421-30.
45. Campbell RM, Klei AG, Hodges BD, Fisman D, Kitto S. A comparison of health access between permanent residents, undocumented immigrants and refugee claimants in Toronto, Canada. *J Immigr Minor Health*. 2014;16(1):165-76.



**Table 1.** Cohort of immigrant and non-immigrant children and youth in Ontario, 2010

|                                     | Non-immigrants |      | Immigrants |      |
|-------------------------------------|----------------|------|------------|------|
|                                     | N              | %    | N          | %    |
| <b>Overall</b>                      | 3,171,110      |      | 914,372    |      |
| <b>Age group (years)</b>            |                |      |            |      |
| 0 - 4                               | 544,938        | 17.2 | 186,770    | 20.4 |
| 5 - 9                               | 565,129        | 17.8 | 186,052    | 20.3 |
| 10 - 14                             | 613,955        | 19.4 | 191,901    | 21.0 |
| 15 - 19                             | 719,693        | 22.7 | 178,666    | 19.5 |
| 20 - 24                             | 727,395        | 22.9 | 170,983    | 18.7 |
| <b>Sex</b>                          |                |      |            |      |
| Female                              | 1,547,106      | 48.8 | 445,381    | 48.7 |
| Male                                | 1,624,004      | 51.2 | 468,991    | 51.3 |
| <b>Neighborhood income quintile</b> |                |      |            |      |
| Q1 - lowest                         | 563,314        | 17.8 | 268,317    | 29.3 |
| Q2                                  | 571,014        | 18.0 | 199,314    | 21.8 |
| Q3                                  | 625,353        | 19.7 | 183,429    | 20.1 |
| Q4                                  | 698,687        | 22.0 | 160,234    | 17.5 |
| Q5 - highest                        | 712,742        | 22.5 | 103,078    | 11.3 |
| <b>Rurality</b>                     |                |      |            |      |
| Urban                               | 2,731,160      | 86.1 | 903,371    | 98.8 |
| Rural                               | 439,950        | 13.9 | 11,001     | 1.2  |

**Table 2.** Unintentional injury related emergency department visits, hospitalizations, and deaths by immigrant status, 2008 to 2012.

|                                     | <b>Emergency department visits</b> |                         |                       |                         | <b>Hospitalizations</b> |                         |                       |                         | <b>Deaths</b>     |                         |                       |                         |
|-------------------------------------|------------------------------------|-------------------------|-----------------------|-------------------------|-------------------------|-------------------------|-----------------------|-------------------------|-------------------|-------------------------|-----------------------|-------------------------|
|                                     | <b>Immigrants</b>                  |                         | <b>Non-immigrants</b> |                         | <b>Immigrants</b>       |                         | <b>Non-immigrants</b> |                         | <b>Immigrants</b> |                         | <b>Non-immigrants</b> |                         |
|                                     | <b>N</b>                           | <b>Rate per 100,000</b> | <b>N</b>              | <b>Rate per 100,000</b> | <b>N</b>                | <b>Rate per 100,000</b> | <b>N</b>              | <b>Rate per 100,000</b> | <b>N</b>          | <b>Rate per 100,000</b> | <b>N</b>              | <b>Rate per 100,000</b> |
| <b>Age group (years)</b>            |                                    |                         |                       |                         |                         |                         |                       |                         |                   |                         |                       |                         |
| 0 - 4                               | 71791                              | 7754.4                  | 307481                | 11288.5                 | 1702                    | 183.8                   | 6653                  | 244.2                   | 30                | 3.2                     | 184                   | 6.7                     |
| 05-09                               | 54354                              | 5827.5                  | 273305                | 9637.1                  | 1450                    | 155.4                   | 5781                  | 203.8                   | 14                | 1.5                     | 60                    | 2.1                     |
| 10-14                               | 62561                              | 6542.3                  | 450183                | 14538.9                 | 1207                    | 126.1                   | 6837                  | 220.7                   | 16                | 1.7                     | 115                   | 3.7                     |
| 15-19                               | 61219                              | 6794.2                  | 569594                | 15940.5                 | 1879                    | 208.8                   | 14664                 | 410.4                   | 83                | 9.2                     | 738                   | 20.6                    |
| 20-24                               | 57815                              | 6895.1                  | 495019                | 13587.1                 | 1754                    | 209.3                   | 12898                 | 354.0                   | 165               | 19.7                    | 1140                  | 31.3                    |
| <b>Sex</b>                          |                                    |                         |                       |                         |                         |                         |                       |                         |                   |                         |                       |                         |
| Female                              | 117063                             | 5201.2                  | 843147                | 10869                   | 2948                    | 133.0                   | 17647                 | 225.0                   | 88                | 4.2                     | 613                   | 7.6                     |
| Male                                | 190677                             | 8210.0                  | 1252435               | 15311                   | 5044                    | 219.7                   | 29186                 | 353.6                   | 220               | 10.6                    | 1624                  | 19.1                    |
| <b>Neighborhood income quintile</b> |                                    |                         |                       |                         |                         |                         |                       |                         |                   |                         |                       |                         |
| Q1 - lowest                         | 87203                              | 6508.3                  | 408717                | 14407.9                 | 2550                    | 192.4                   | 9858                  | 341.0                   | 112               | 9.0                     | 606                   | 20.0                    |
| Q2                                  | 63893                              | 6418.4                  | 394427                | 13693.9                 | 1748                    | 178.4                   | 8768                  | 299.4                   | 65                | 7.3                     | 411                   | 13.3                    |
| Q3                                  | 60562                              | 6615.2                  | 410798                | 13055.1                 | 1513                    | 167.2                   | 8989                  | 283.0                   | 56                | 7.0                     | 403                   | 12.4                    |
| Q4                                  | 57083                              | 7129.9                  | 444584                | 12700.7                 | 1332                    | 169.1                   | 9568                  | 272.2                   | 53                | 7.7                     | 422                   | 12.0                    |
| Q5 - highest                        | 38999                              | 7508.3                  | 437056                | 12124.3                 | 849                     | 164.7                   | 9650                  | 265.7                   | 22                | 4.8                     | 395                   | 10.6                    |
| <b>Rural</b>                        |                                    |                         |                       |                         |                         |                         |                       |                         |                   |                         |                       |                         |
| Urban                               | 300162                             | 6650.2                  | 1667436               | 12146.5                 | 7853                    | 176.2                   | 38255                 | 275.8                   | 298               | 7.3                     | 1698                  | 11.8                    |
| Rural                               | 7578                               | 13652.5                 | 428146                | 19218.8                 | 139                     | 257.3                   | 8578                  | 383.1                   | 10                | 18.7                    | 539                   | 23.7                    |

1  
2  
3  
4  
5  
6  
7  
8  
9  
10  
11  
12  
13  
14  
15  
16  
17  
18  
19  
20  
21  
22  
23  
24  
25  
26  
27  
28  
29  
30  
31  
32  
33  
34  
35  
36  
37  
38  
39  
40  
41  
42  
43  
44  
45  
46  
47  
48  
49

**Table 3.** Risk ratios of unintentional injuries for children and youth ages 0 to 24 years by immigration status, annualized 2008-2012.

|                                     | <b>Immigrants (N = 4551291)</b> | <b>Non-immigrants (N = 15866954)</b> |
|-------------------------------------|---------------------------------|--------------------------------------|
|                                     | <b>Risk ratio (95% CI)</b>      | <b>Risk ratio (95% CI)</b>           |
| <b>Age</b>                          |                                 |                                      |
| 00-04                               | 1.23 (1.15, 1.31)               | 0.90 (0.86, 0.94)                    |
| 05-09                               | 0.92 (0.86, 0.99)               | 0.77 (0.73, 0.81)                    |
| 10-14                               | 1.02 (0.95, 1.09)               | 1.14 (1.09, 1.19)                    |
| 15-19                               | 1.01 (0.94, 1.08)               | 1.19 (1.14, 1.24)                    |
| 20-24                               | Reference                       | Reference                            |
| <b>Sex</b>                          |                                 |                                      |
| Male                                | 1.53 (1.47, 1.60)               | 1.40 (1.36, 1.45)                    |
| Female                              | Reference                       | Reference                            |
| <b>Neighborhood income quintile</b> |                                 |                                      |
| Q1-lowest                           | 0.87 (0.81, 0.93)               | 1.13 (1.08, 1.18)                    |
| Q2                                  | 0.86 (0.80, 0.92)               | 1.10 (1.05, 1.15)                    |
| Q3                                  | 0.88 (0.82, 0.95)               | 1.06 (1.01, 1.11)                    |
| Q4                                  | 0.95 (0.89, 1.03)               | 1.04 (0.99, 1.09)                    |
| Q5-highest                          | Reference                       | Reference                            |
| <b>Rurality</b>                     |                                 |                                      |
| Rural                               | 2.04 (1.79, 2.33)               | 1.59 (1.53, 1.65)                    |
| Urban                               | Reference                       | Reference                            |

**Table 4.** Adjusted rate ratios and crude rates of cause-specific unintentional injury-related emergency department visits, hospitalizations, and deaths in children and youth ages 0 to 24 years by immigration status, annualized 2008-2012.

| Injury cause                                   | Adjusted* risk ratio (95% CI)<br>(Reference = non-immigrants) | Crude injury rate per<br>100,000 immigrants | Crude injury rate<br>per 100,000 non-<br>immigrants |
|------------------------------------------------|---------------------------------------------------------------|---------------------------------------------|-----------------------------------------------------|
| Fall                                           | 0.59 (0.57, 0.62)                                             | 2108.6                                      | 3574.9                                              |
| Struck by/against                              | 0.48 (0.45, 0.51)                                             | 1347.6                                      | 3069.3                                              |
| Overexertion                                   | 0.57 (0.53, 0.62)                                             | 568.4                                       | 1104.2                                              |
| Cut/pierce                                     | 0.47 (0.44, 0.50)                                             | 372.9                                       | 917.5                                               |
| Natural/environmental                          | 0.39 (0.37, 0.42)                                             | 183.0                                       | 511.9                                               |
| Other bicycle (Non-motor vehicle collision)    | 0.53 (0.48, 0.58)                                             | 165.8                                       | 327.8                                               |
| Poisoning                                      | 0.60 (0.56, 0.63)                                             | 136.6                                       | 230.6                                               |
| Motor vehicle traffic                          | 0.76 (0.72, 0.80)                                             | 308.5                                       | 468.4                                               |
| Hot object/scald                               | 0.71 (0.65, 0.77)                                             | 88.5                                        | 132.0                                               |
| Fire/flame                                     | 0.37 (0.32, 0.42)                                             | 12.4                                        | 40.5                                                |
| Other pedestrian (Non-motor vehicle collision) | 0.65 (0.59, 0.73)                                             | 10.3                                        | 15.9                                                |
| Machinery                                      | 0.56 (0.50, 0.64)                                             | 17.2                                        | 40.7                                                |
| Suffocation                                    | 0.65 (0.56, 0.75)                                             | 5.5                                         | 8.2                                                 |
| Other land transport                           | 0.23 (0.20, 0.26)                                             | 36.6                                        | 230.8                                               |
| Drowning                                       | 0.72 (0.59, 0.87)                                             | 2.9                                         | 4.0                                                 |
| Firearm                                        | 0.50 (0.40, 0.63)                                             | 3.3                                         | 7.1                                                 |
| Other or not specified                         | 0.63 (0.60, 0.67)                                             | 1335.9                                      | 2257.2                                              |

\* Adjusted for age, sex, income, and rurality  
CI, Confidence interval
